# Supplementary material for: Comparative pharmacokinetics of four active components on normal and diabetic rats after oral administration of Gandi capsules
Source: Royal Society of Chemistry journal article supplement (doi:10.1039/c7ra11420f), 2018-01-01
Supplement: c7ra11420f1.pdf [file c7ra11420f1.pdf]

Table S1 List of selected multiple reaction monitoring parameters and collision energies (CE) of sixteen active ingredients in Gandi Capsules and the LLOQs in plasma samples

| Analytes         | Q1 mass (Da) | Q3 mass (Da) | Collision energies (eV) | LLOQs (ng/mL) |
|------------------|--------------|--------------|-------------------------|---------------|
| Baicalin         | 447.0        | 271.0        | 24.0                    | 1.0           |
| Wogonoside       | 461.2        | 285.0        | 24.0                    | 5.0           |
| wogonin          | 285.0        | 270.0        | 33.0                    | 5.0           |
| loganin          | 408.2        | 229.0        | 12.0                    | 2.0           |
| rutin            | 609.0        | 299.9        | -44.0                   | 2.0           |
| rehmannioside D  | 731.1        | 263.0        | -33.0                   | 0.5           |
| astragaloside IV | 785.6        | 143.0        | 18.0                    | 1.0           |
| quercetin        | 300.8        | 150.8        | -30.0                   | 2.0           |
| isoquercetin     | 463.1        | 299.9        | -33                     | 5.0           |
| Isoastragaloside | 913.4        | 58.9         | -60                     | 5.0           |
| scutellarin      | 461.1        | 285.0        | -23.0                   | 4.0           |
| scutellarein     | 285.0        | 116.9        | -40.0                   | 5.0           |
| Sweroside        | 403.2        | 124.9        | -24                     | 2.5           |
| ferulic acid     | 192.7        | 133.8        | -21                     | 5.0           |
| caffeic acid     | 178.6        | 134.9        | -21                     | 1.0           |
| isoacteoside     | 623.1        | 160.9        | -44                     | 1.0           |
